# Supplementary material for: Dehydrative etherification of carbohydrates to 5-ethoxymethylfurfural over SBA-15-supported Sn-modified heteropolysilicate catalysts
Source: Royal Society of Chemistry journal article supplement (doi:10.1039/d0se00509f), 2020-01-01
Supplement: d0se00509f1.pdf [file d0se00509f1.pdf]

*Supplementary Information*

**Dehydrative etherification of carbohydrates to 5-ethoxymethylfurfural over SBA-15 supported Sn modified heteropoly silicate catalysts<sup>†</sup>**

B. Srinivasa Rao <sup>a,b</sup>, D. Dhana Lakshmi <sup>a,b</sup>, P. Krishna Kumari <sup>a,b</sup>, P. Rajitha <sup>a,b</sup> and

N. Lingaiah <sup>a,b</sup> \*

<sup>a</sup>Department of Catalysis and Fine Chemicals, CSIR-Indian Institute of Chemical Technology, Hyderabad-500 007, India.

<sup>b</sup>CSIR-Academy of Scientific and Innovative Research (CSIR-AcSIR), New Delhi, India.

\*Corresponding author

Email: [nakkalingaiah@iict.res.in](mailto:nakkalingaiah@iict.res.in); Tel: +91-40-27191722

<sup>†</sup>IICT Communication No: IICT/Pubs./2019-210

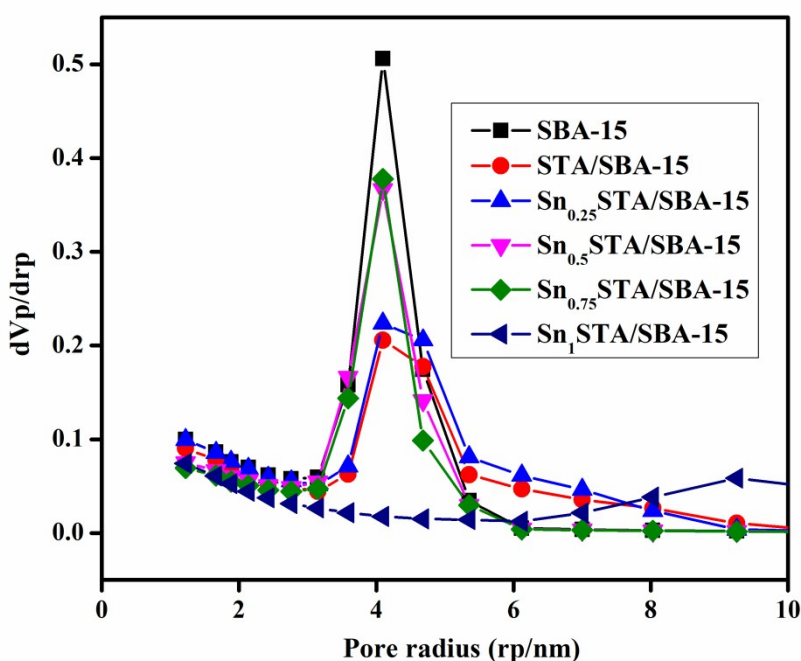

**Fig. S1.** Pore size distribution curves of the catalysts

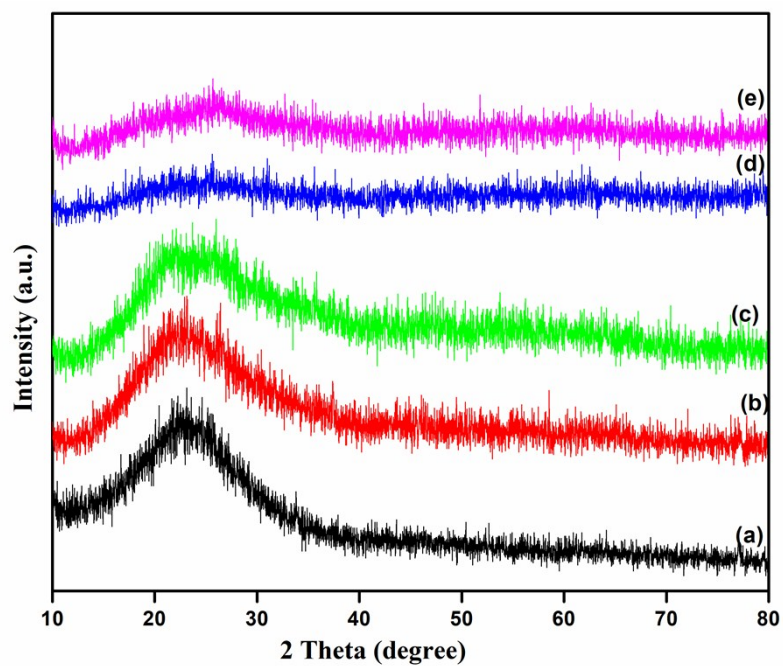

**Fig. S2.** Wide angle XRD patterns of  $\text{Sn}_{x/4}\text{H}_{4-x}\text{STA}$  supported on SBA-15 catalysts. (a) SBA-15, (b) 20% $\text{Sn}_{0.2}\text{5STA}$ , (c) 20% $\text{Sn}_{0.5}\text{5STA}$ , (d) 20% $\text{Sn}_{0.7}\text{5STA}$ , (e) 20% $\text{Sn}_1\text{STA}$ .

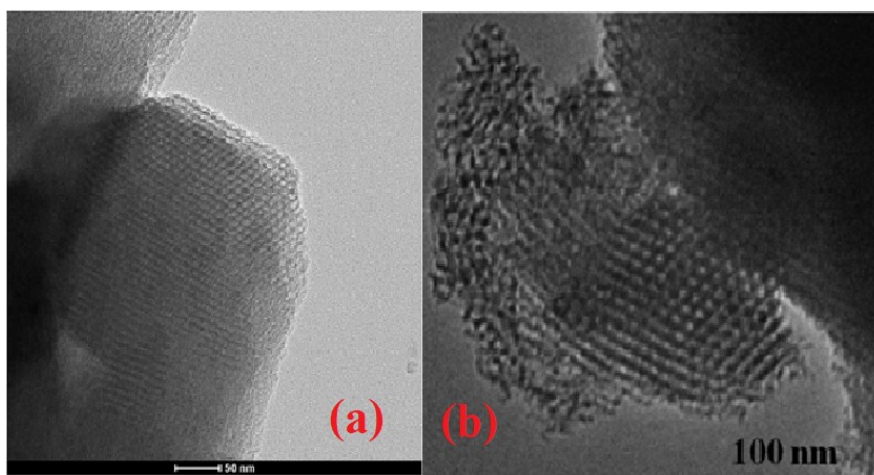

**Fig. S3.** TEM analysis of (a) SBA-15 and (b) 20%  $\text{Sn}_{0.75}\text{STA/SBA-15}$  catalysts.

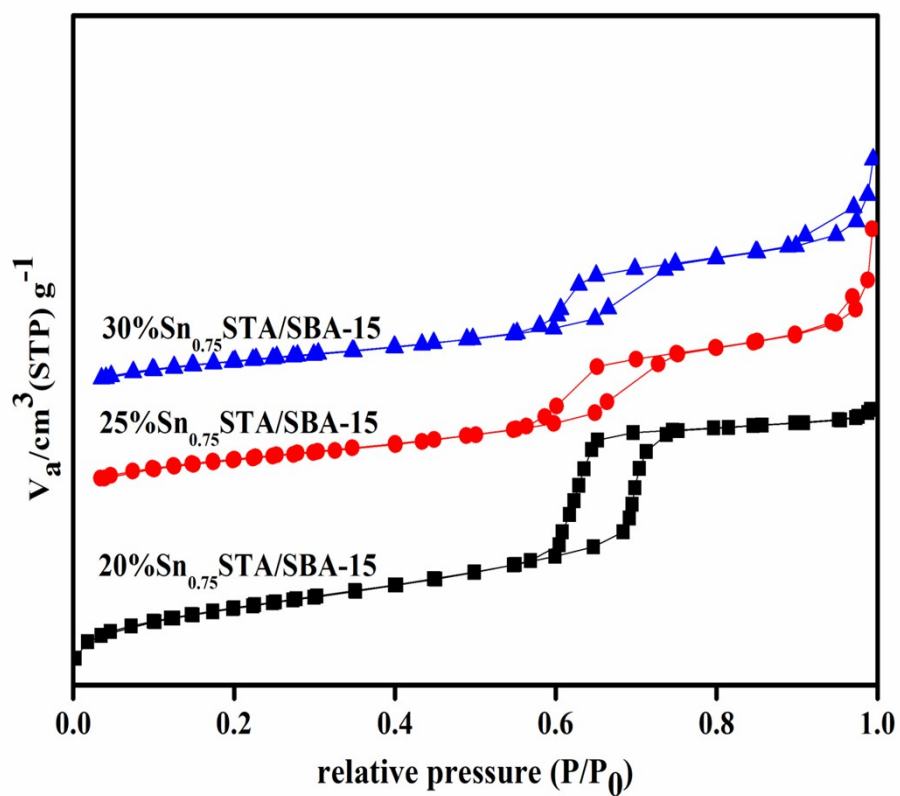

**Fig. S4.** N<sub>2</sub> adsorption-desorption isotherms of different loadings of 20%Sn<sub>0.75</sub>STA/SBA-15 catalysts.

**Table S1.** Textural properties of Sn<sub>0.75</sub>STA/SBA-15 catalysts with different loadings.

| Catalyst                          | S <sub>BET</sub>                  | Total pore volume                  | Mean pore     |
|-----------------------------------|-----------------------------------|------------------------------------|---------------|
|                                   | (m <sup>2</sup> g <sup>-1</sup> ) | (cm <sup>3</sup> g <sup>-1</sup> ) | Diameter (nm) |
| 20% Sn <sub>0.75</sub> STA/SBA-15 | 450                               | 0.57                               | 8.03          |
| 25% Sn <sub>0.75</sub> STA/SBA-15 | 362                               | 0.53                               | 6.79          |
| 30% Sn <sub>0.75</sub> STA/SBA-15 | 347                               | 0.51                               | 6.45          |
